# Supplementary material for: Unconventional Extraction of Total Non-Polar Carotenoids from Pumpkin Pulp and Their Nanoencapsulation
Source: MDPI journal article supplement (doi:10.3390/molecules27238240), 2022-11-25
Supplement: s1 [file s1]

*Supplementary Material*

# Unconventional Extraction of Total Non-Polar Carotenoids from Pumpkin Pulp and their Nanoencapsulation

Nicola Pinna <sup>1,†</sup>, Federica Ianni <sup>1,†</sup>, Francesca Blasi <sup>1,\*</sup>, Arianna Stefani <sup>2</sup>, Michela Codini <sup>1</sup>, Stefano Sabatini <sup>2</sup>, Aurélie Schoubben <sup>2,\*</sup> and Lina Cossignani <sup>1,3</sup>

<sup>1</sup> Department of Pharmaceutical Sciences, Section of Food Sciences and Nutrition, University of Perugia, 06126 Perugia, Italy

<sup>2</sup> Department of Pharmaceutical Sciences, Section of Pharmaceutical Chemistry and Technology, University of Perugia, 06123 Perugia, Italy

<sup>3</sup> Center for Perinatal and Reproductive Medicine, Santa Maria della Misericordia University Hospital, University of Perugia, 06132 Perugia, Italy

\* Correspondence: francesca.blasi@unipg.it (F.B.); aurelie.schoubben@unipg.it (A.S.); +39-075-585-7954 (F.B.); +39-075-585-2057 (A.S.)

† These authors have equally contributed

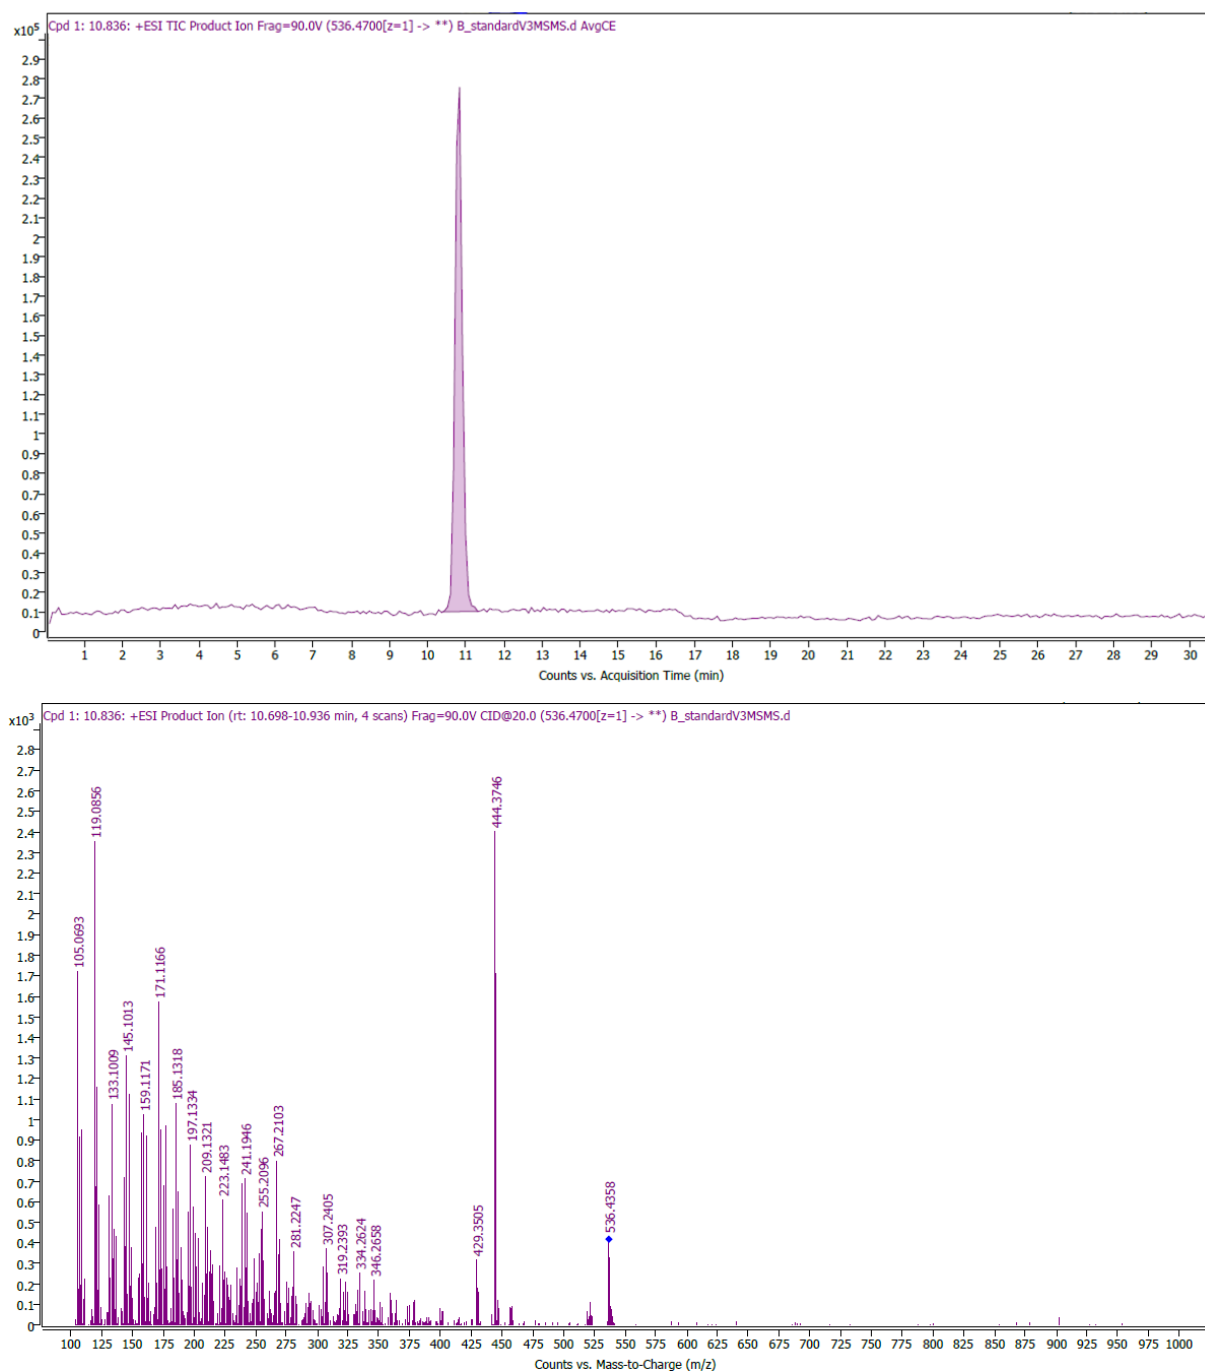

**Figure S1.** Fragment ion spectrum for  $\beta$ -carotene commercial standard.

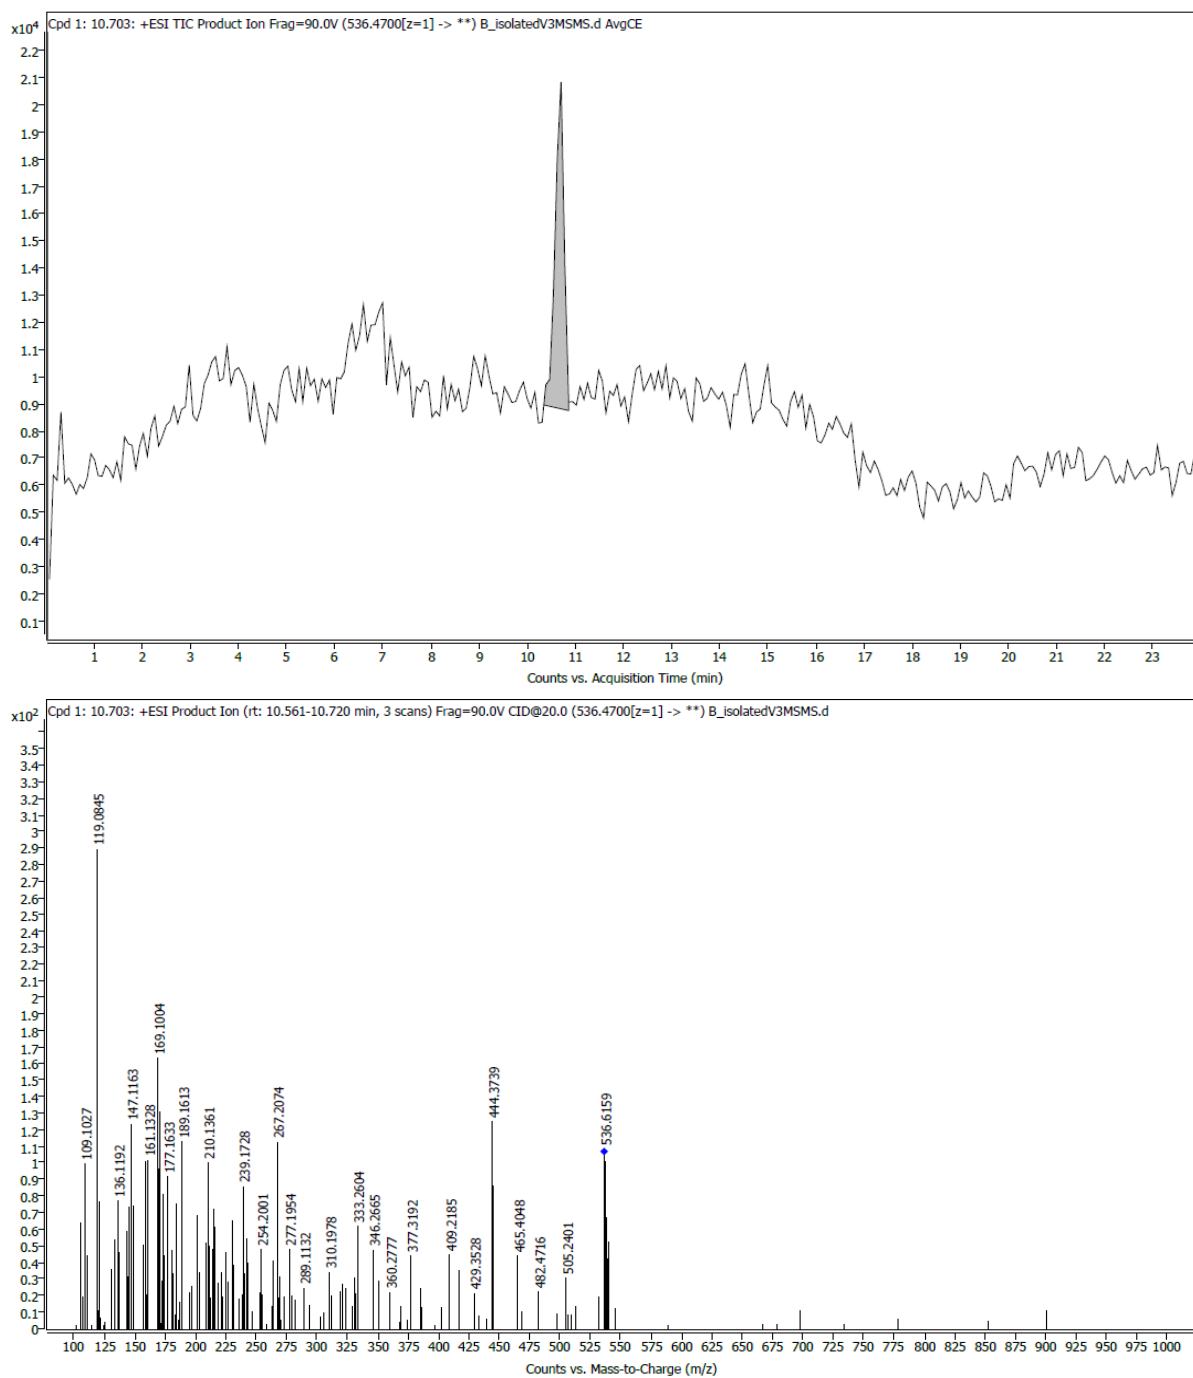

**Figure S2.** Fragment ion spectrum for  $\beta$ -carotene isolated by HPLC.

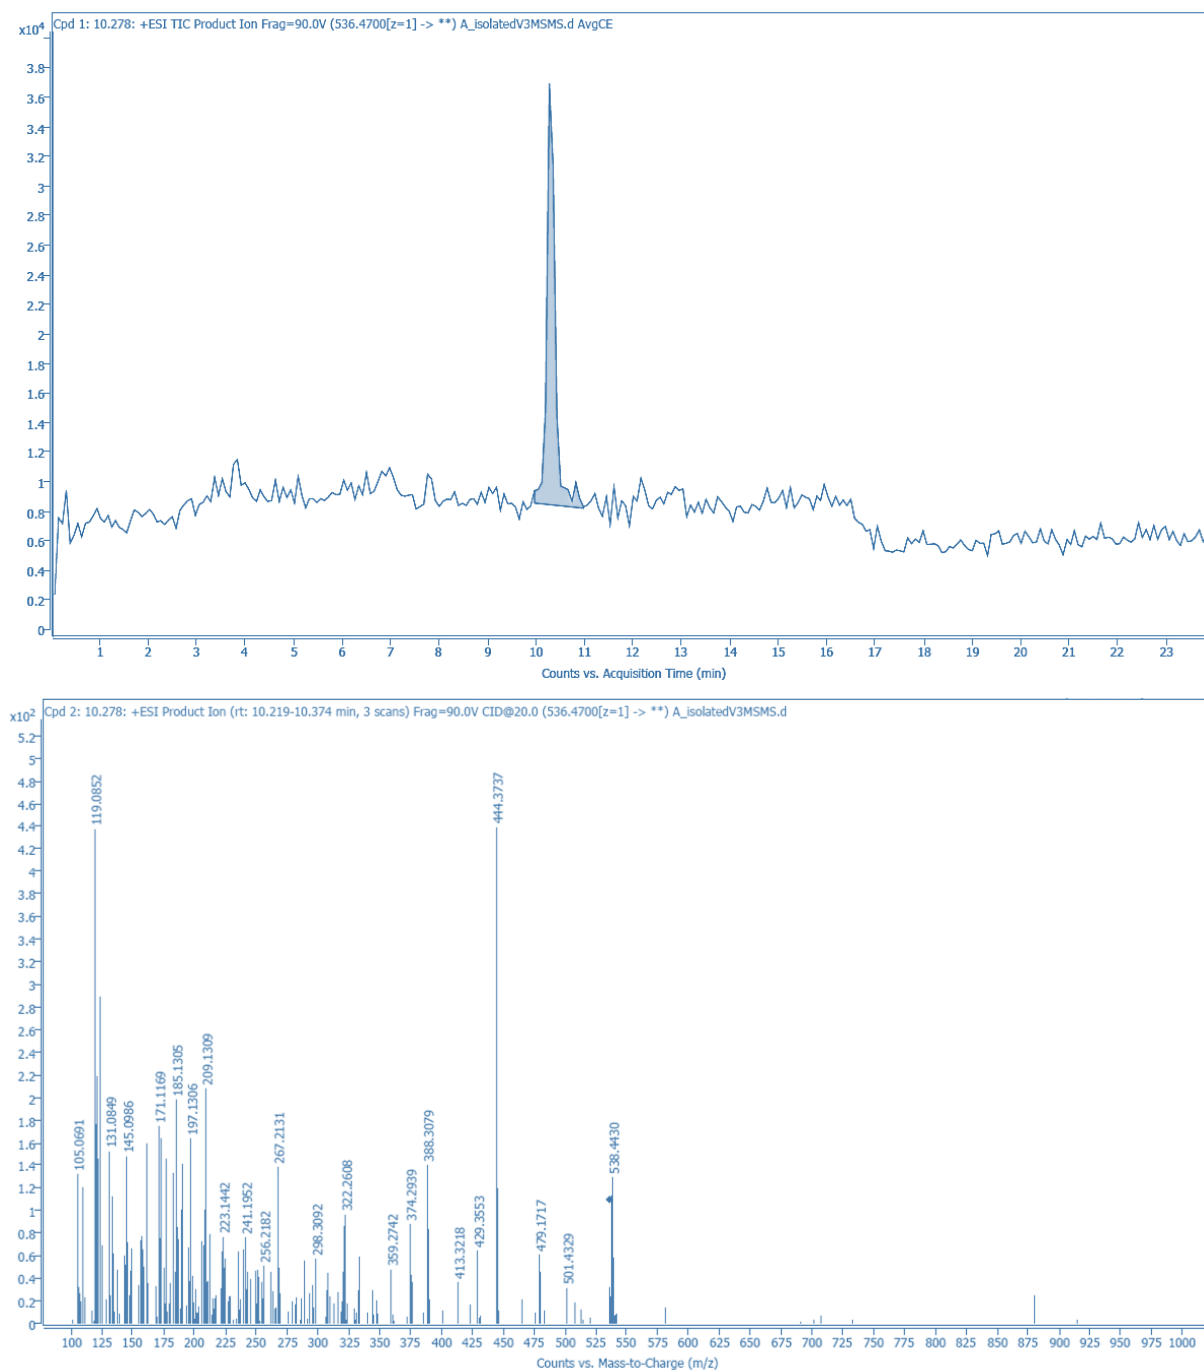

**Figure S3.** Fragment ion spectrum for  $\alpha$ -carotene isolated by HPLC.
